# Supplementary material for: Evaluation of the Risk of African Swine Fever Virus Transmission at the Interface between Feral and Domestic Pigs in Lombardy, with a View to Establishing Preventive Measures for Domestic Pigs
Source: MDPI journal article supplement (doi:10.3390/pathogens12121462), 2023-12-18
Supplement: s1 [file s1]

| FARM | SUB-CODE | TYPE                            | SPECIES   | MUNICIPALITY          | PROV | Agenzia di Tutela della Salute (ATS)  | ANIMALS | % territory |
|------|----------|---------------------------------|-----------|-----------------------|------|---------------------------------------|---------|-------------|
| A    | 4        | Growing - finishing             | Pigs      | Montevecchia          | LC   | ATS OF BRIANZA                        | 2       | 100%        |
| B    | 7        | Growing - finishing             | Pigs      | Besate                | MI   | ATS OF THE METROPOLITAN CITY OF MILAN | 2       | 100%        |
| C    | 2        | Growing - finishing             | Pigs      | Tremosine Sul Garda   | BS   | ATS OF BRESCIA                        | 0       | 100%        |
| D    | 3        | Breeding - closed loop          | Pigs      | Robecco Sul Naviglio  | MI   | ATS OF THE METROPOLITAN CITY OF MILAN | 42      | 100%        |
| E    | 3        | Growing - finishing             | Pigs      | Introbio              | LC   | ATS OF BRIANZA                        | 15      | 94%         |
| F    | 4        | Breeding - closed loop          | Pigs      | Roncobello            | BG   | ATS OF BERGAMO                        | 4       | 93%         |
| G    | 5        | Breeding - closed loop          | Pigs      | Cremeno               | LC   | ATS OF BRIANZA                        | 6       | 77%         |
| H    | 3        | Growing - finishing             | Pigs      | San Giuliano Milanese | MI   | ATS OF THE METROPOLITAN CITY OF MILAN | 6       | 75%         |
| I    | 5        | Growing - finishing             | Pigs      | Brianza Hill          | LC   | ATS OF BRIANZA                        | 0       | 70%         |
| J    | 9        | Wild Boar Hunting Establishment | Wild boar | Sabbio Chiese         | BS   | ATS OF BRESCIA                        | 0       | 66%         |
| K    | 2        | Growing - finishing             | Pigs      | Calvatone             | CR   | ATS OF THE PADANA VALLEY              | 0       | 63%         |
| L    | 9        | Breeding - open loop            | Pigs      | Valletta Brianza      | LC   | ATS OF BRIANZA                        | 27      | 63%         |
| M    | 1        | Growing - finishing             | Pigs      | Ponte Nizza           | PV   | ATS OF PAVIA                          | 0       | 50%         |
| N    | 3        | Breeding - open loop            | Pigs      | Cene                  | BG   | ATS OF BERGAMO                        | 5       | 48%         |
| O    | 4        | Breeding - closed loop          | Pigs      | Colico                | LC   | ATS OF BRIANZA                        | 20      | 35%         |
| P    | 5        | Breeding - open loop            | Pigs      | Monza                 | MB   | ATS OF BRIANZA                        | 9       | 22%         |
| Q    | 1        | Wild Boar Hunting Establishment | Wild boar | Iseo                  | BS   | ATS OF BRESCIA                        | 3       | 26%         |
| R    | 3        | Breeding - closed loop          | Wild boar | Torre De' Roveri      | BG   | ATS OF BERGAMO                        | 43      | 18%         |
| S    | 3        | Breeding - closed loop          | Wild boar | Torre De' Roveri      | BG   | ATS OF BERGAMO                        | 13      | 18%         |
| T    | 4        | Breeding - open loop            | Pigs      | Villa Guardia         | CO   | ATS OF INSUBRIA                       | 16      | 13%         |
| U    | 1        | Wild Boar Hunting Establishment | Wild boar | Rivanazzano Terme     | PV   | ATS OF PAVIA                          | 5       | 13%         |
| V    | 7        | Growing - finishing             | Pigs      | Borgo Mantovano       | MN   | ATS OF THE PADANA VALLEY              | 0       | 12%         |
| W    | 1        | Growing - finishing             | Pigs      | Roncoferraro          | MN   | ATS OF THE PADANA VALLEY              | 27      | 10%         |
| X    | 9        | Breeding - open loop            | Pigs      | Quingentole           | MN   | ATS OF THE PADANA VALLEY              | 8       | 6%          |
| Y    | 7        | Breeding - closed loop          | Pigs      | Chignolo D'Isola      | BG   | ATS OF BERGAMO                        | 18      | 5%          |
| Z    | 1        | Breeding - open loop            | Pigs      | Cavriana              | MN   | ATS OF THE PADANA VALLEY              | 4846    | 3%          |
| AA   | 6        | Growing - finishing             | Pigs      | Quistello             | MN   | ATS OF THE PADANA VALLEY              | 0       | 0%          |
